# Supplementary material for: A veratraldehyde-appended organosilicon probe and its hybrid silica nanoparticles as a dual chemosensor for colorimetric and fluorimetric detection of Cu2+ and Fe3+ ions
Source: Royal Society of Chemistry journal article supplement (doi:10.1039/d1nj05105a), 2021-11-15
Supplement: d1nj05105a1.pdf [file d1nj05105a1.pdf]

## Veratraldehyde Appended Organosilicon Probe and its Hybrid Silica Nanoparticles as a Dual Chemosensor for Colorimetric and Fluorimetric Detection of Cu<sup>2+</sup> and Fe<sup>3+</sup> ions

Gurjaspreet Singh<sup>a\*</sup>, Jashan Deep Kaur<sup>a</sup>, Pawan<sup>a</sup>, Sushma<sup>a</sup>, Priyanka<sup>a</sup>, Pinky Satija<sup>b</sup>, K.N. Singh<sup>a\*</sup>, Mari´a Angeles Esteban<sup>c\*</sup>, Cristobal Espinosa-Ruiz<sup>c</sup>

<sup>a</sup>Department of Chemistry, Panjab University, Chandigarh 160014, India

<sup>b</sup>School of Advanced Chemical Sciences, Shoolini University, Solan, Himachal Pradesh, India

<sup>c</sup>Department of Cell Biology & Histology, Faculty of Biology, University of Murcia, 30100 Murcia, Spain

\*Corresponding Authors

1. Prof. Gurjaspreet Singh

Department of Chemistry & Centre of Advanced Studies

Panjab University, Chandigarh, India

Email: [gipsingh@pu.ac.in](mailto:gipsingh@pu.ac.in)

Tel. No: 0172-2534428, 09814302099, 9317502099

Fax No: 0172-2545074

2. Prof. K.N. Singh

Professor,

Department of Chemistry, Panjab University, Chandigarh, India

Email: [kns1947@gmail.com](mailto:kns1947@gmail.com)

3. Mari´a Angeles Esteban

Full professor

Department of Cell Biology & Histology, Faculty of Biology, University of Murcia, 30100

Murcia, Spain

+34 868887665

E-mail: [aesteban@um.es](mailto:aesteban@um.es)

### Table of Contents:

|                                                                               |     |
|-------------------------------------------------------------------------------|-----|
| 1. <sup>1</sup> H NMR spectrum of compound 2a .....                           | S4  |
| 2. <sup>1</sup> H NMR spectrum of compound 3a .....                           | S5  |
| 3. <sup>1</sup> H NMR spectrum of compound 3b .....                           | S6  |
| 4. <sup>1</sup> H NMR spectrum of compound 3c .....                           | S7  |
| 5. <sup>13</sup> C NMR spectrum of compound 2a .....                          | S8  |
| 6. <sup>13</sup> C NMR spectrum of compound 3a .....                          | S9  |
| 7. <sup>13</sup> C NMR spectrum of compound 3b .....                          | S10 |
| 8. <sup>13</sup> C NMR spectrum of compound 3c .....                          | S11 |
| 9. Mass NMR spectrum of compound 2a .....                                     | S12 |
| 10. Mass NMR spectrum of compound 3a.....                                     | S12 |
| 11. Mass NMR spectrum of compound 3b .....                                    | S13 |
| 12. Mass NMR spectrum of compound 3c .....                                    | S13 |
| 13. IR spectrum of compound SiO <sub>2</sub> and V-NPs.....                   | S14 |
| 14. DTA curves of SiO <sub>2</sub> , VBS and V-NPs.....                       | S14 |
| 15. UV- Visible spectra of compound VBS and V-NPs.....                        | S15 |
| 16. The absorption intensities of 3a and V-NPs as functions of pH values..... | S16 |

|                                                                                                                         |     |
|-------------------------------------------------------------------------------------------------------------------------|-----|
| <b>17.</b> Job's plots for the complexation of 3a and V-NPs with Cu <sup>2+</sup> and Fe <sup>3+</sup> ions .....       | S17 |
| <b>18.</b> B-H plots for 3a and V-NPs with Cu <sup>2+</sup> and Fe <sup>3+</sup> ions.....                              | S18 |
| <b>19.</b> LOD plots of 3a and V-NPs for Cu <sup>2+</sup> and Fe <sup>3+</sup> ions .....                               | S19 |
| <b>20.</b> Response time studies of 3a and V-NPs in the presence of Cu <sup>2+</sup> and Fe <sup>3+</sup> ions<br>..... | S20 |
| <b>21.</b> Stern-Volmer plots for the compounds 3a and V-NPs .....                                                      | S21 |
| <b>22.</b> IR spectrum of compound 3a, 3a-Cu <sup>2+</sup> and 3a-Fe <sup>3+</sup> .....                                | S22 |

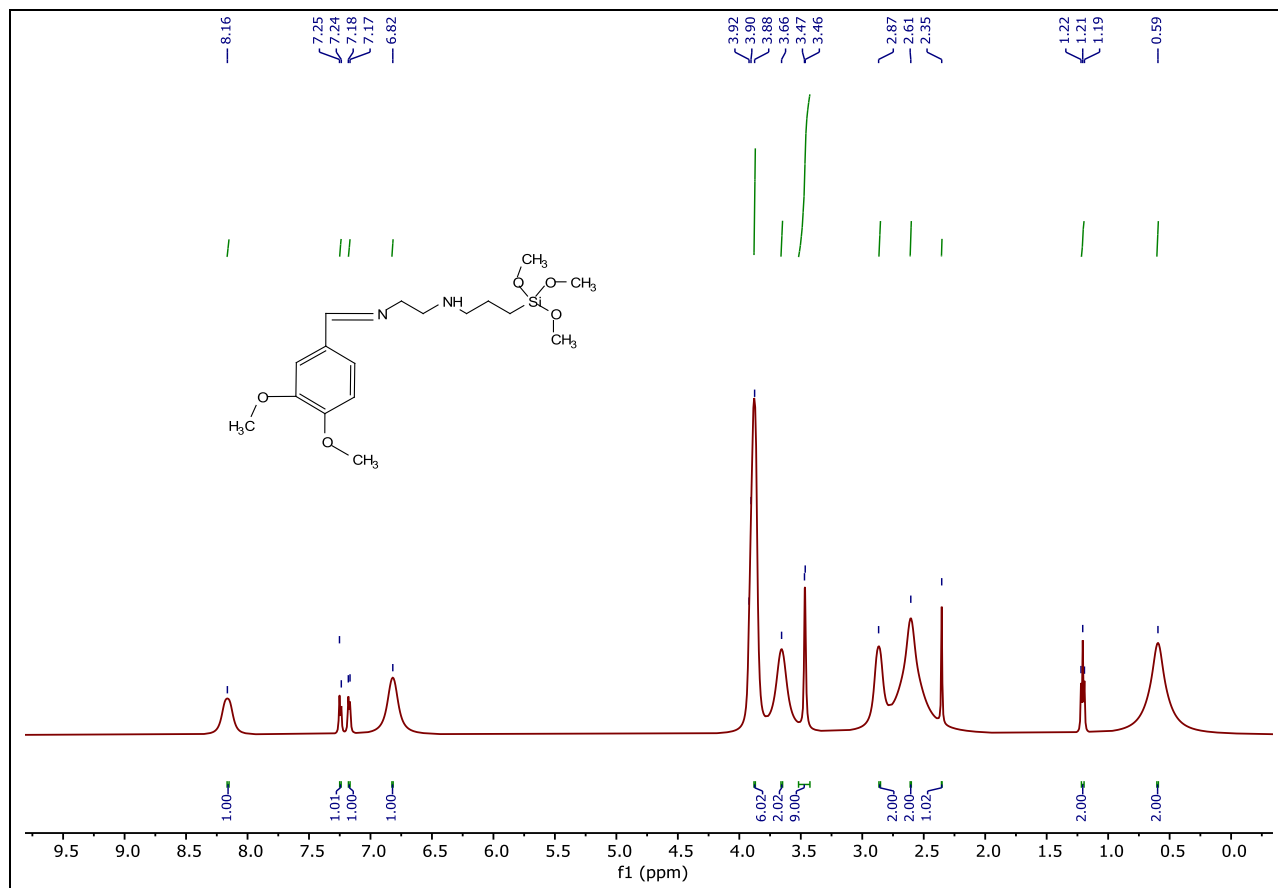

**Fig.S1:**  $^1\text{H}$  NMR spectrum of compound 2a

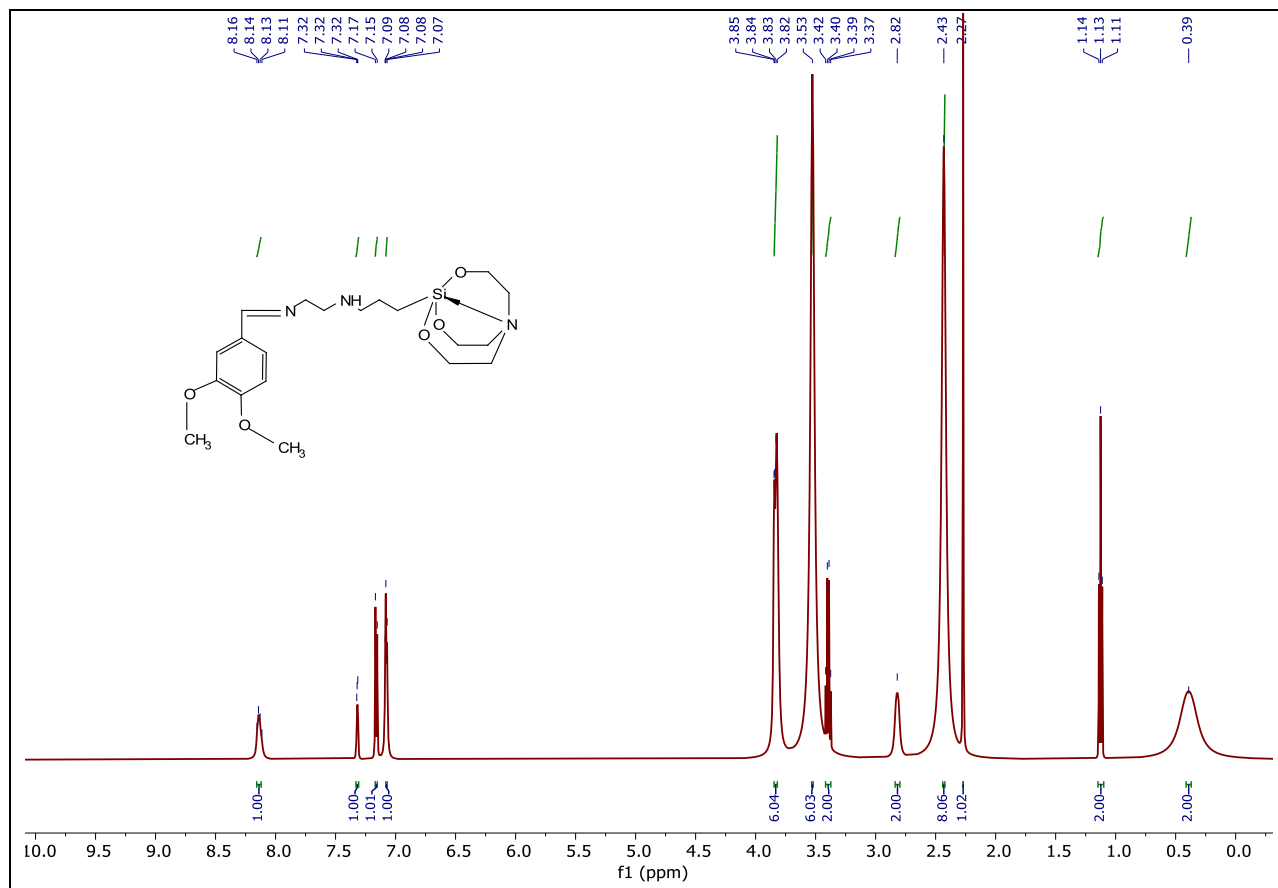

**Fig.S2:**  $^1\text{H}$  NMR spectrum of compound 3a

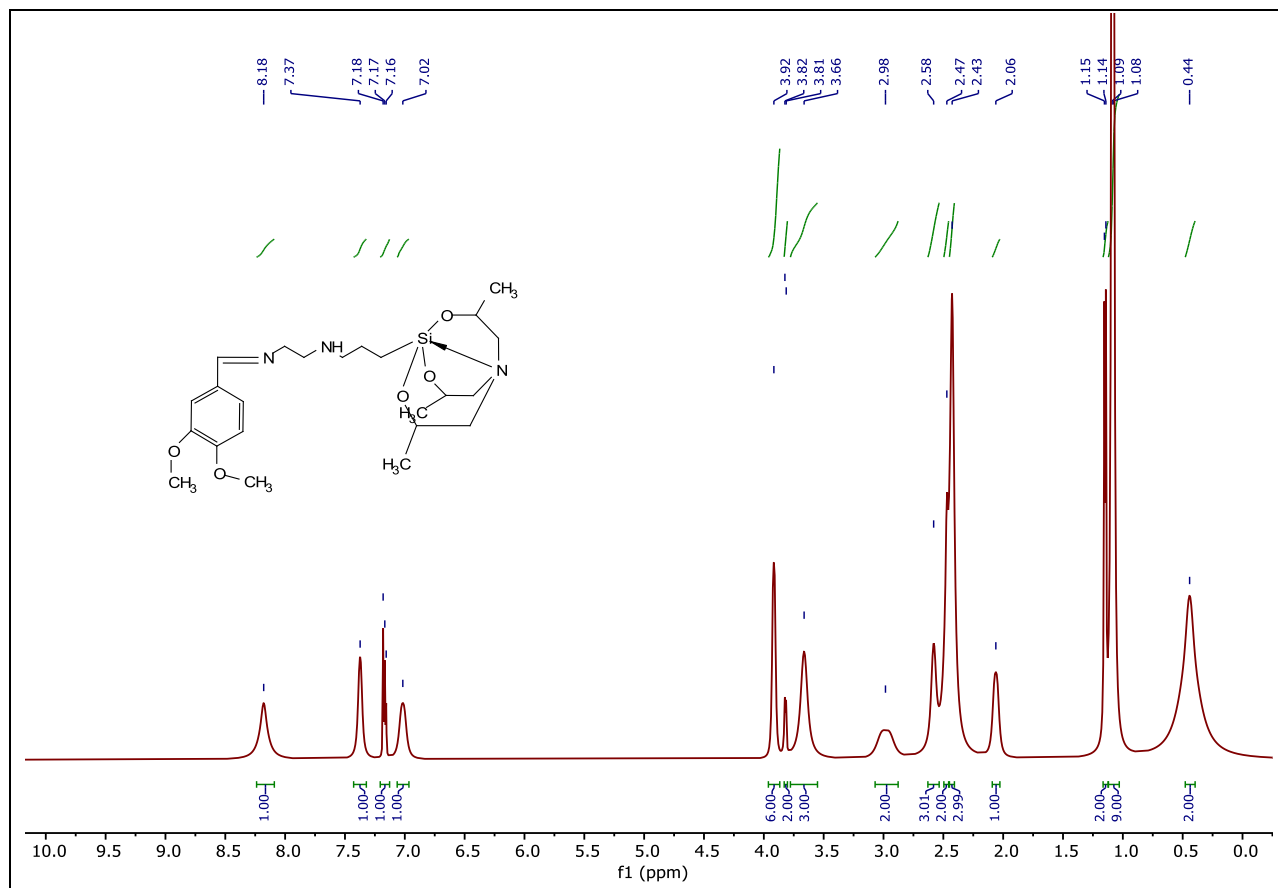

**Fig.S3:** <sup>1</sup>H NMR spectrum of compound 3b

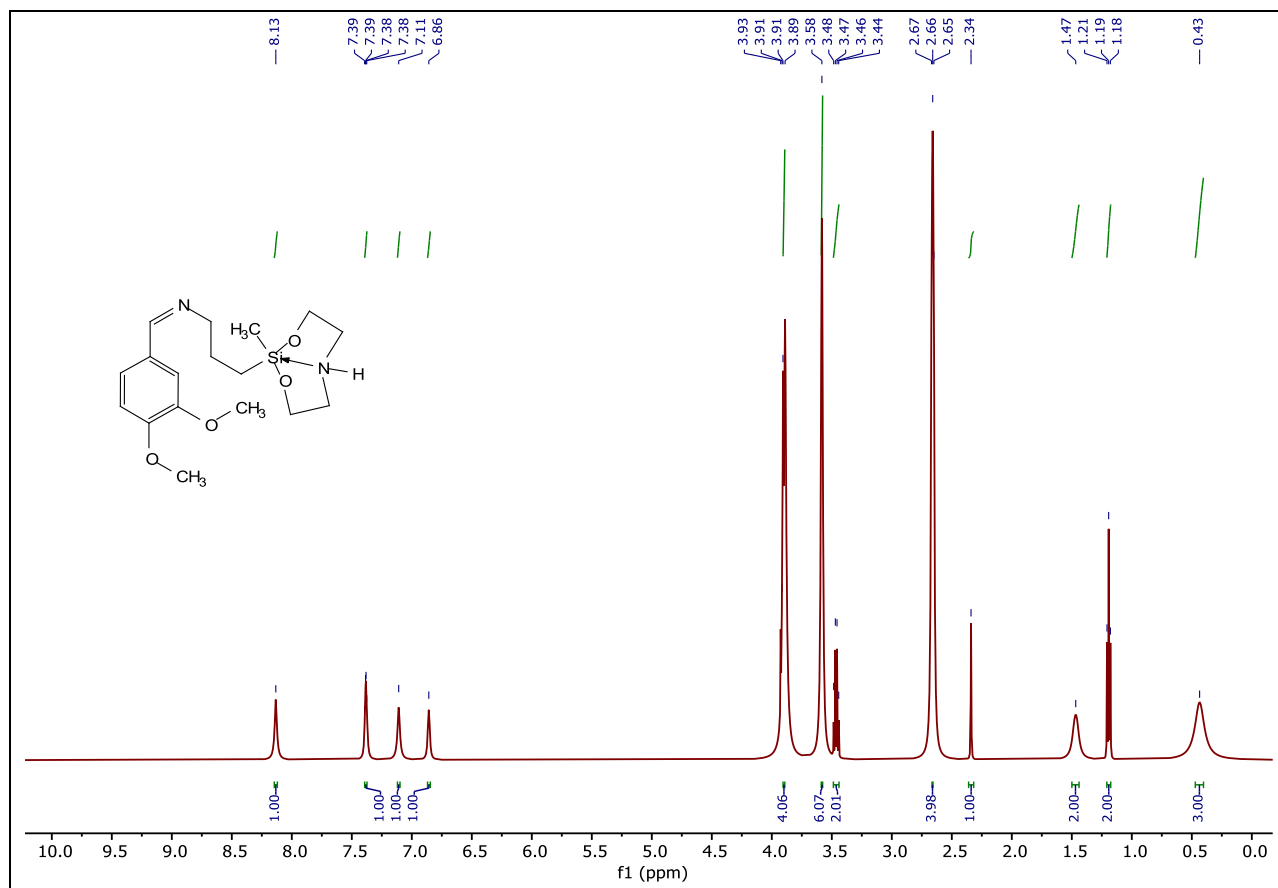

**Fig.S4:**  $^1\text{H}$  NMR spectrum of compound 3c

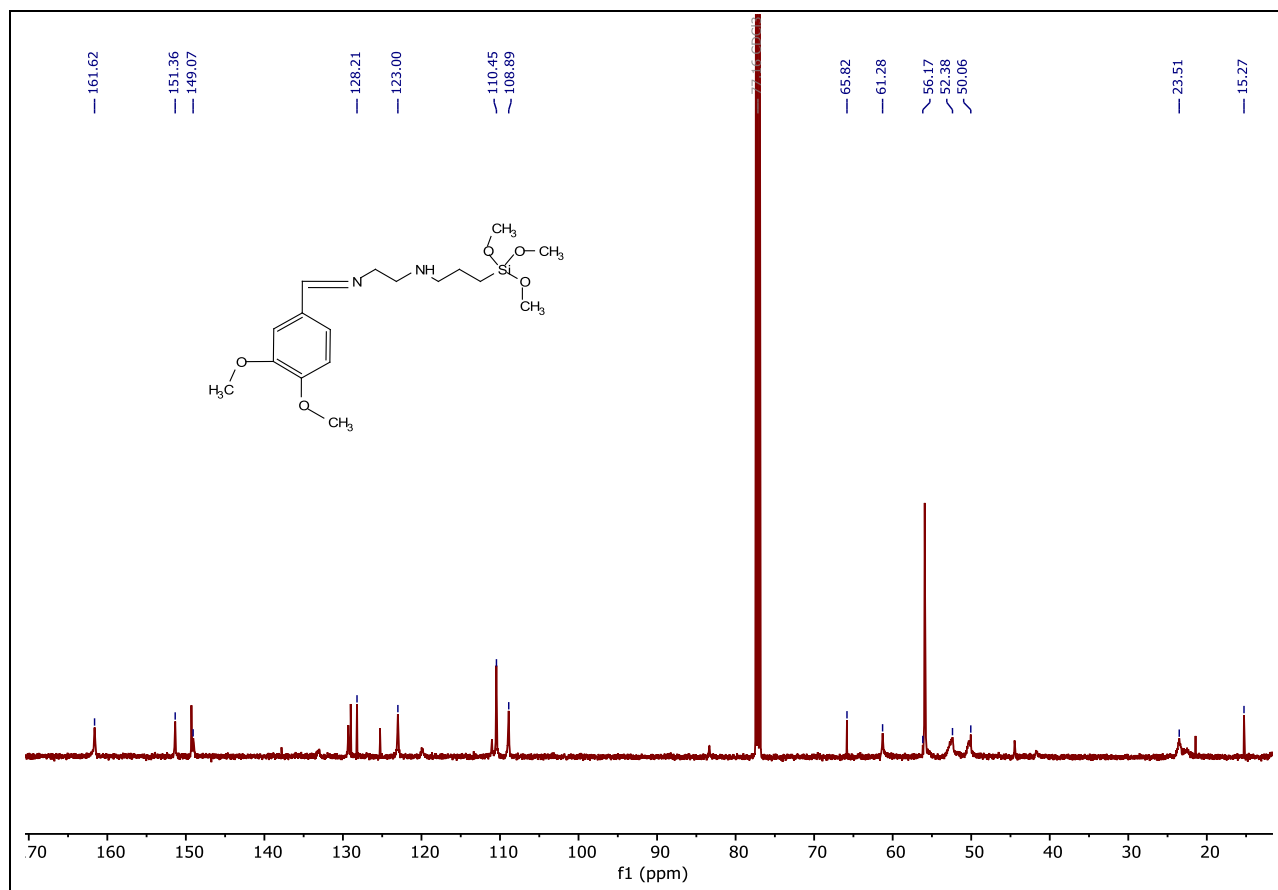

**Fig.S5:** <sup>13</sup>C NMR spectrum of compound 2a



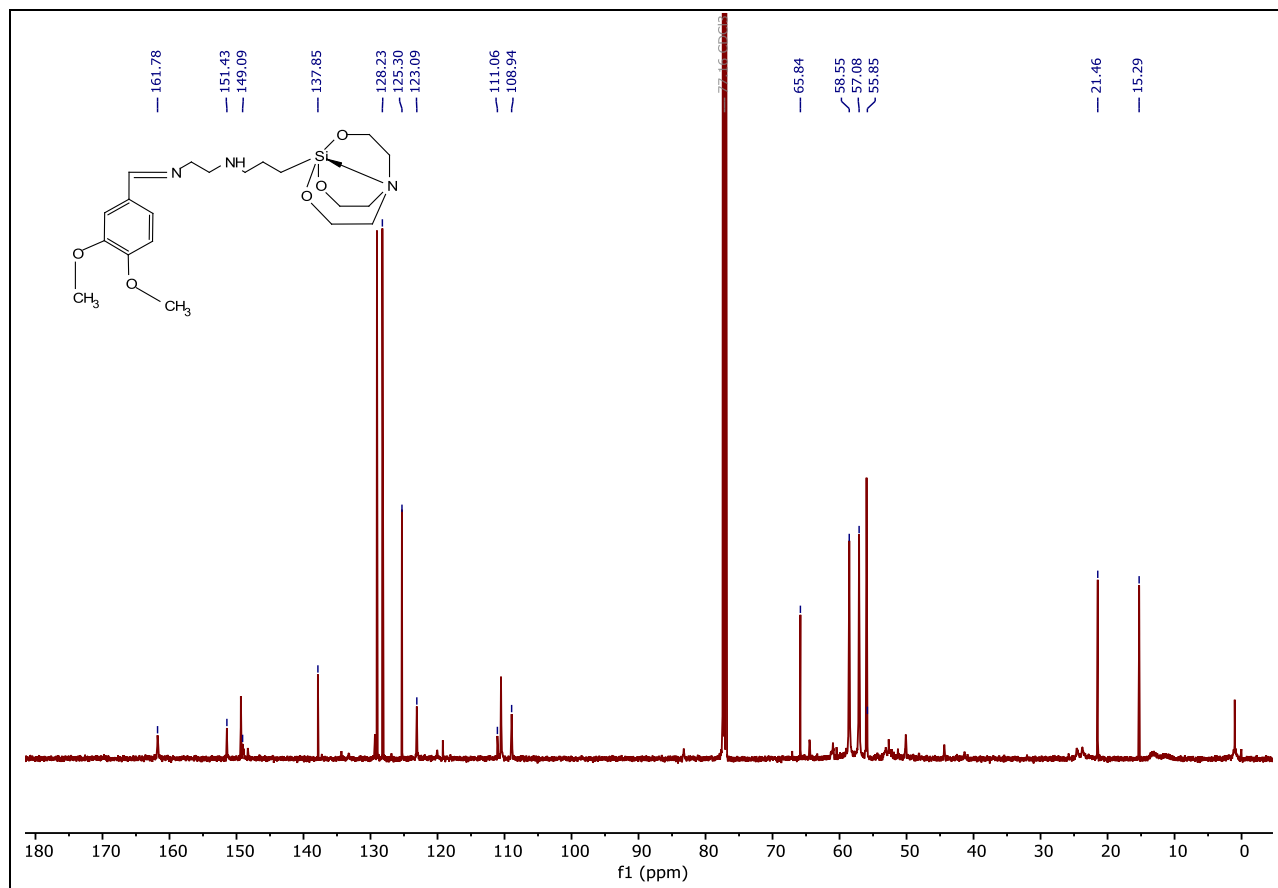

**Fig.S6:** <sup>13</sup>C NMR spectrum of compound 3a

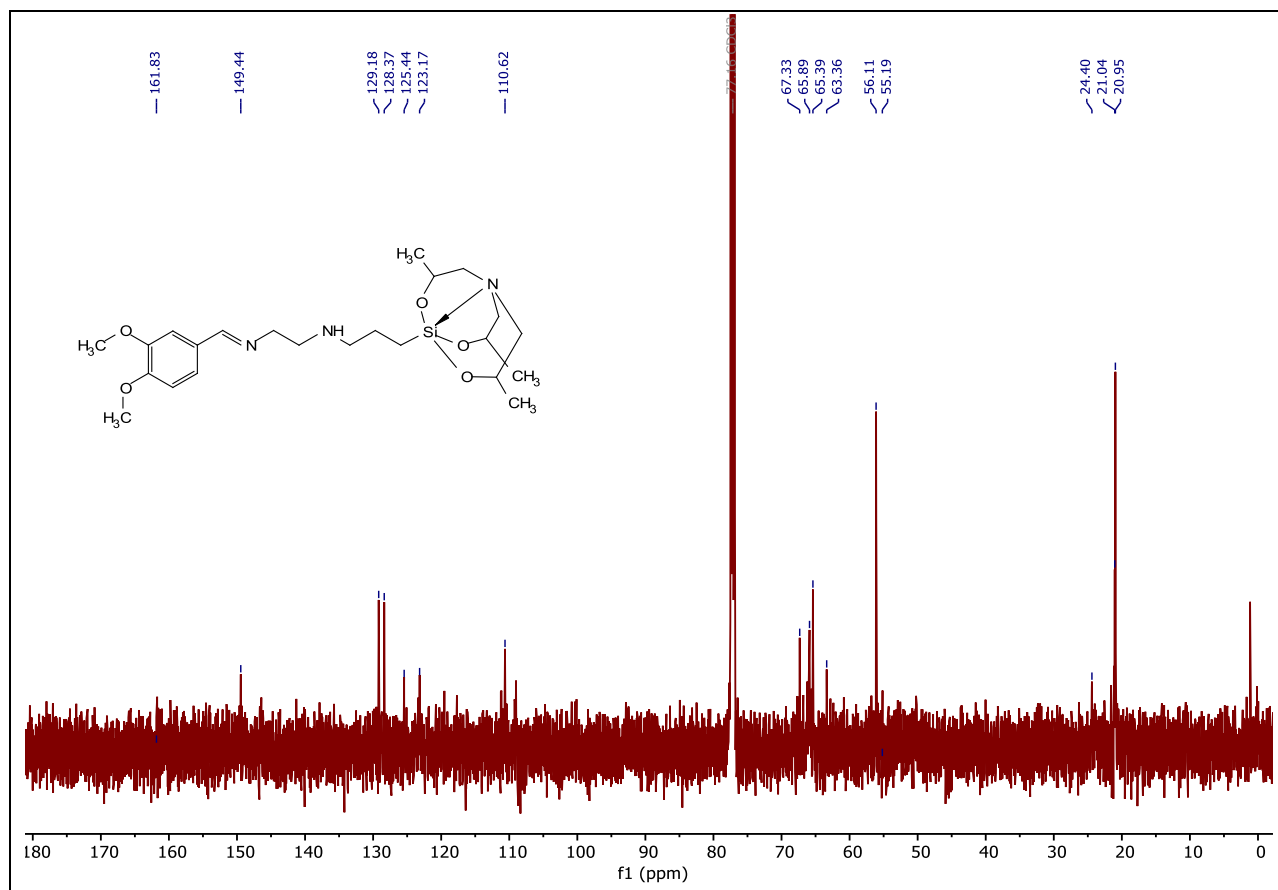

**Fig.S7:** <sup>13</sup>C NMR spectrum of compound 3b

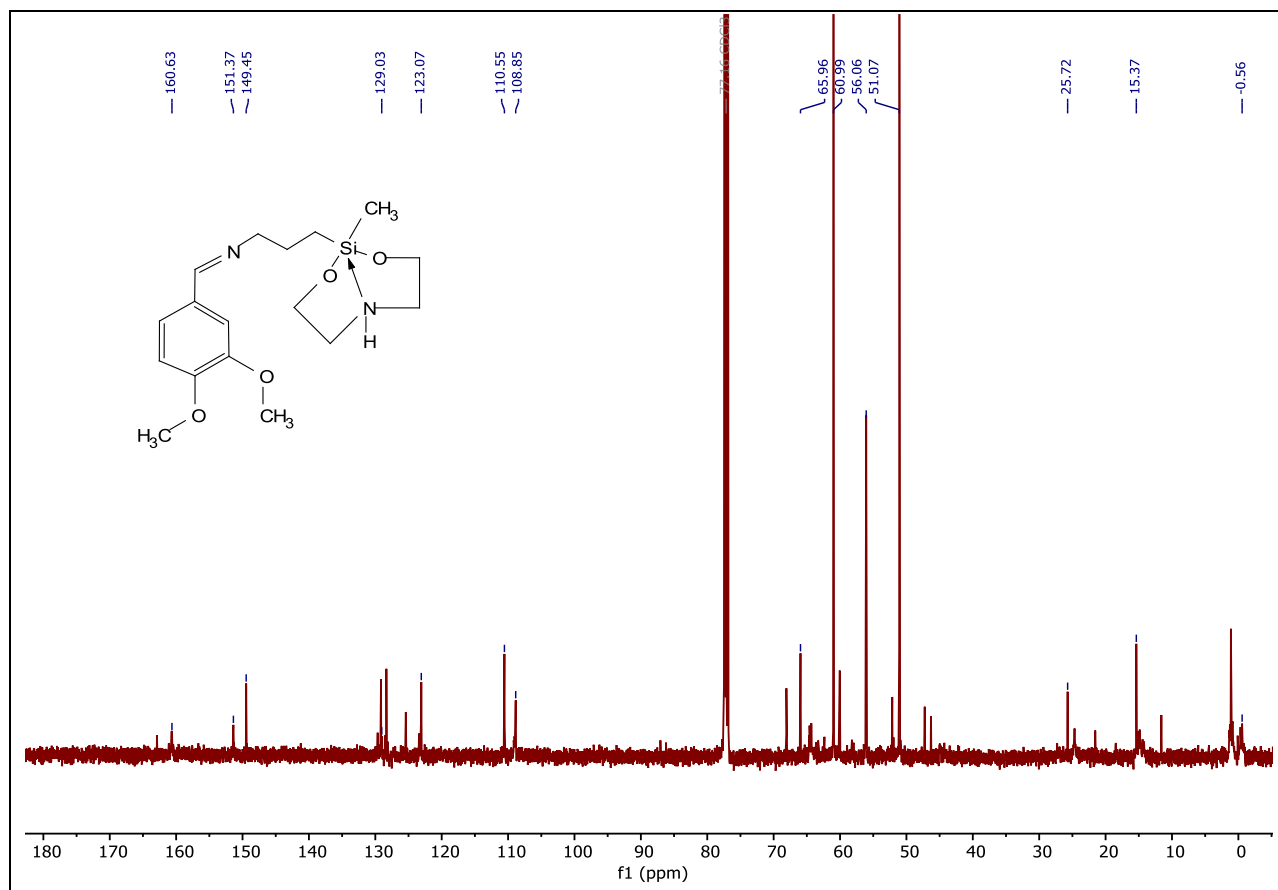

**Fig.S8:** <sup>13</sup>C NMR spectrum of compound 3c

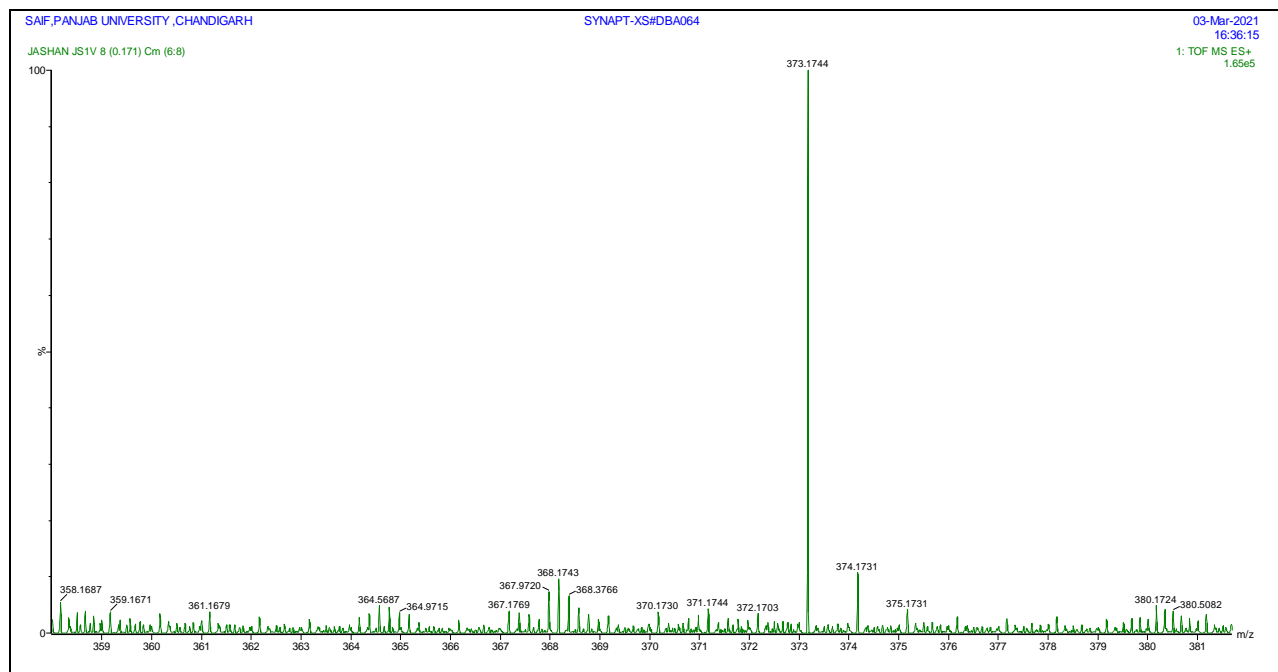

**Fig.S9:** Mass spectrum of compound 2a

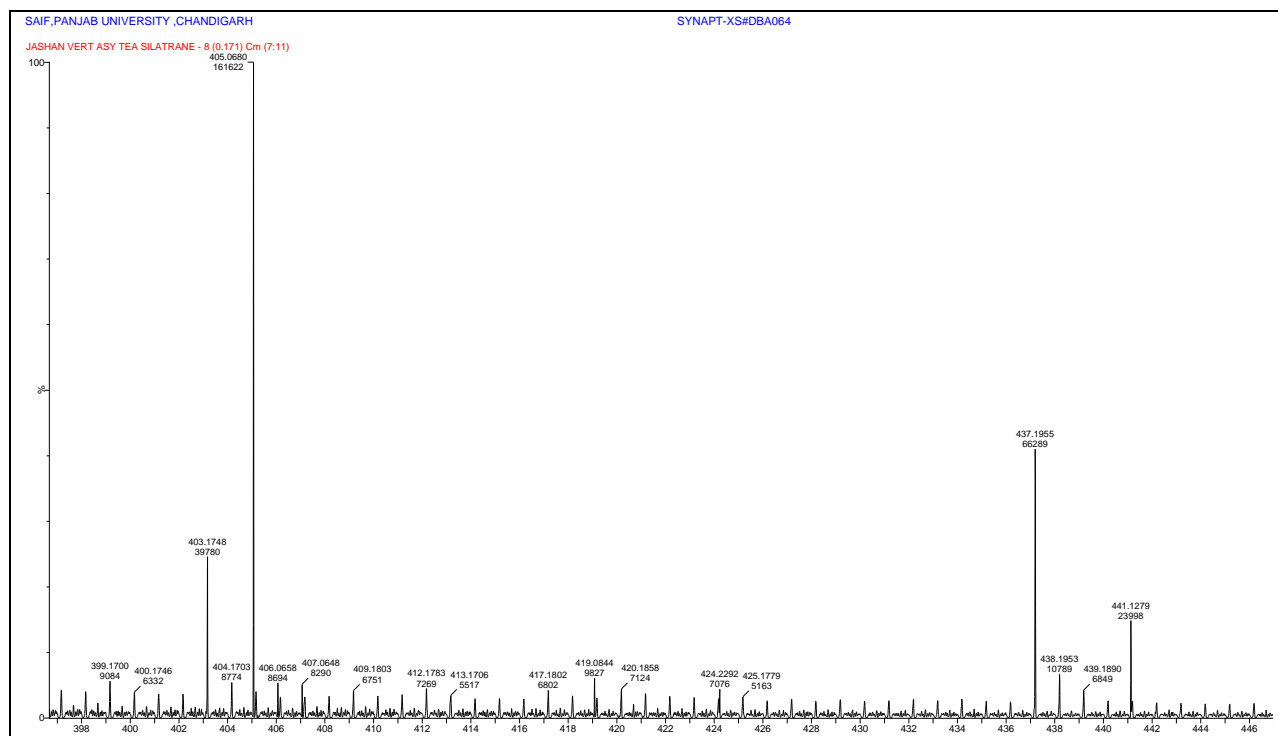

**Fig.S10:** Mass spectrum of compound 3a

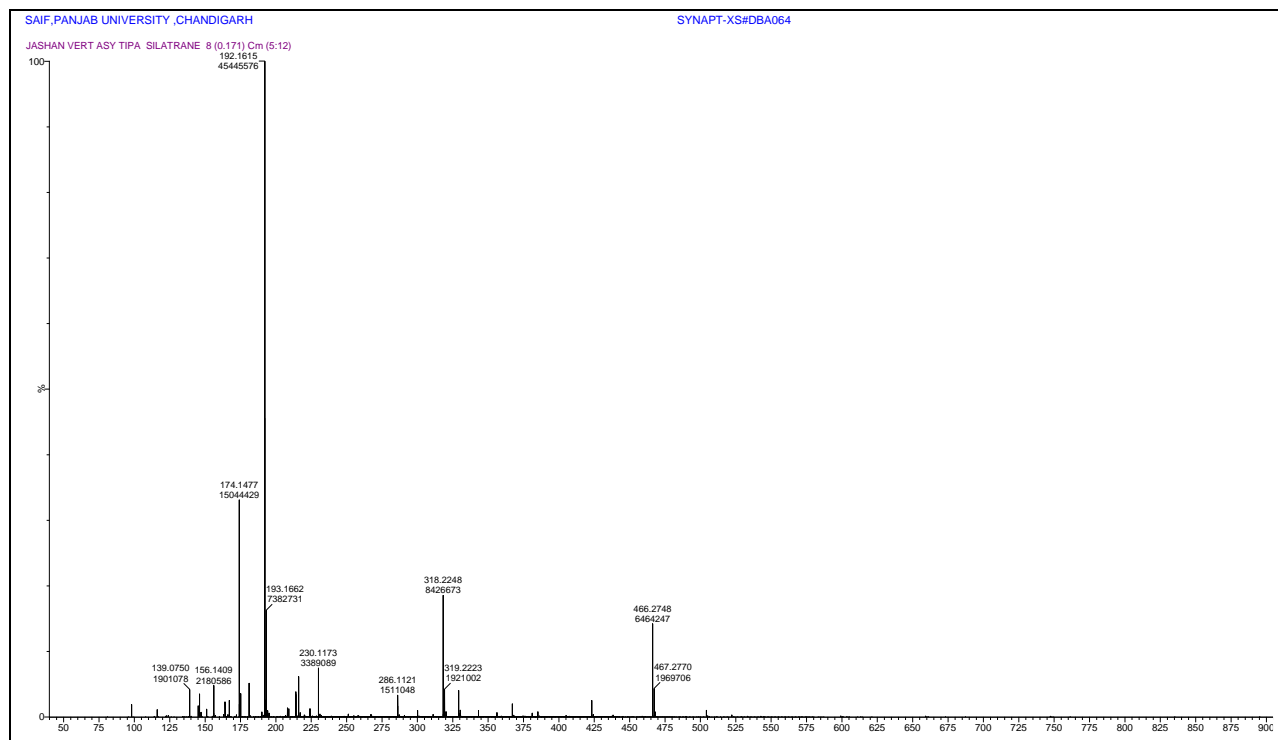

Fig.S11: Mass spectrum of compound 3b

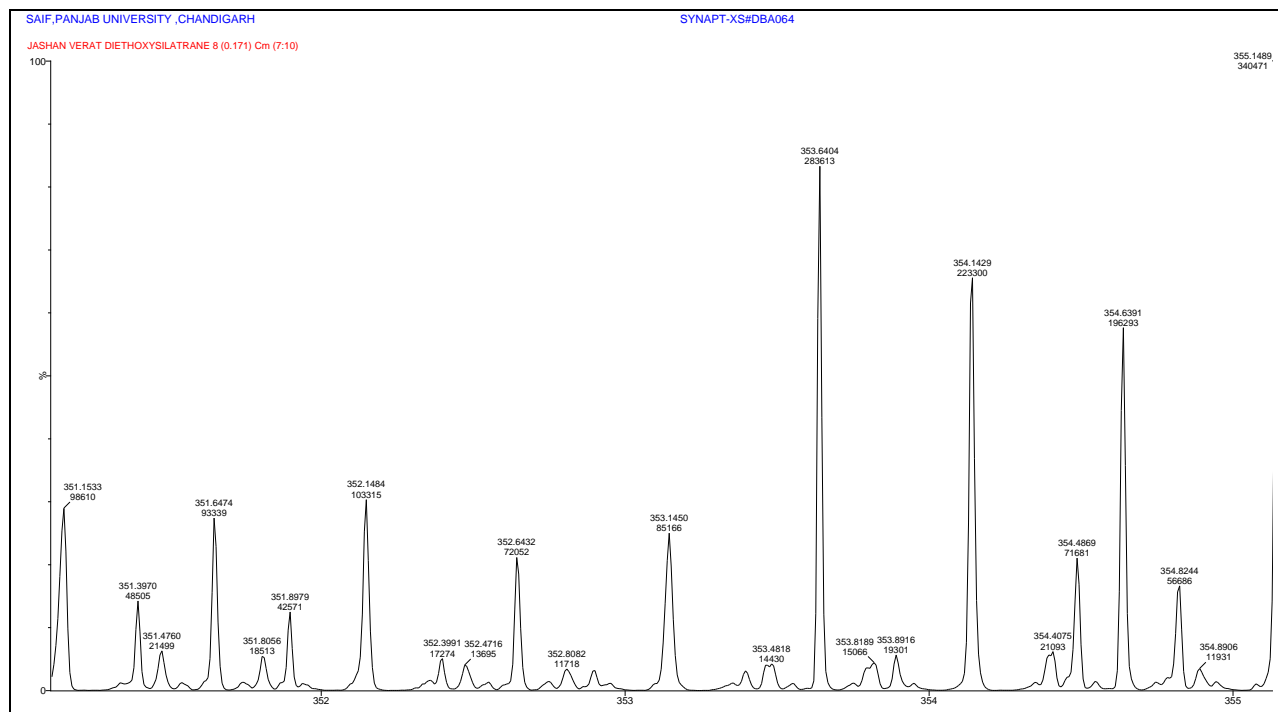

Fig.S12: Mass spectrum of compound 3c

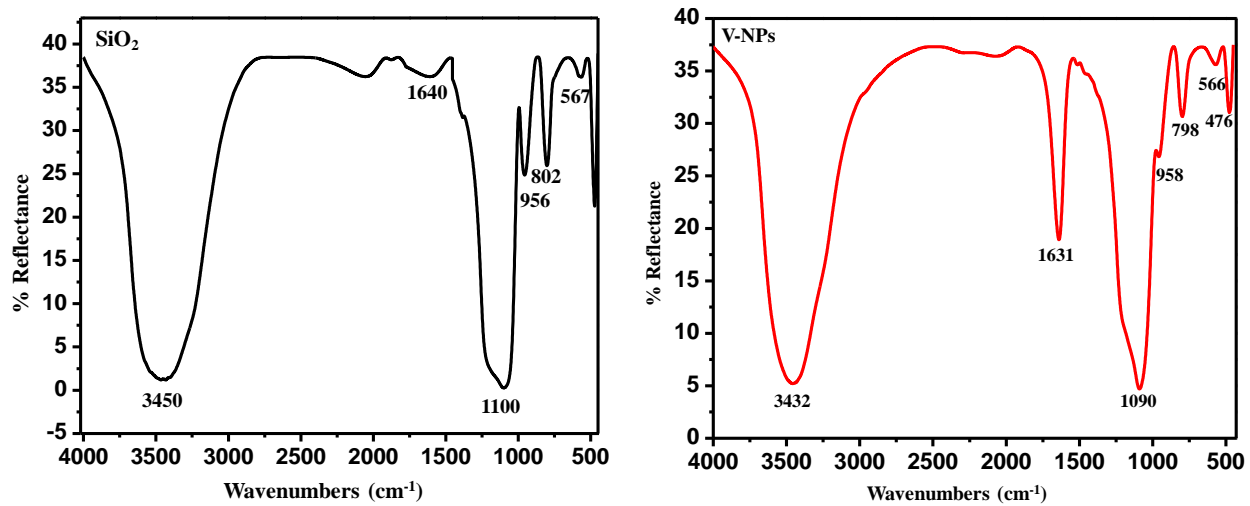

**Fig. S13:** FT-IR spectra of silica nanoparticles (SiO<sub>2</sub>) and V-NPs

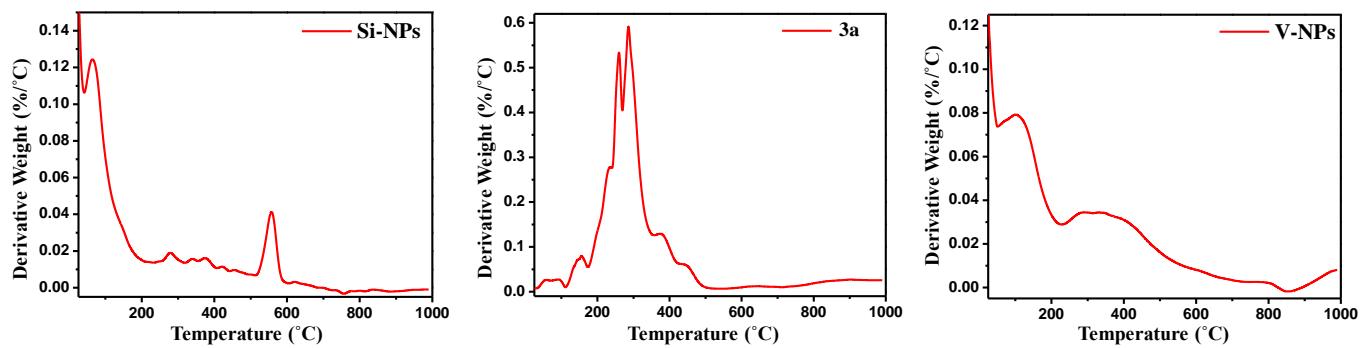

**Fig. S14:** DTA curves of silica nanoparticles (SiO<sub>2</sub>), 3a and V-NPs

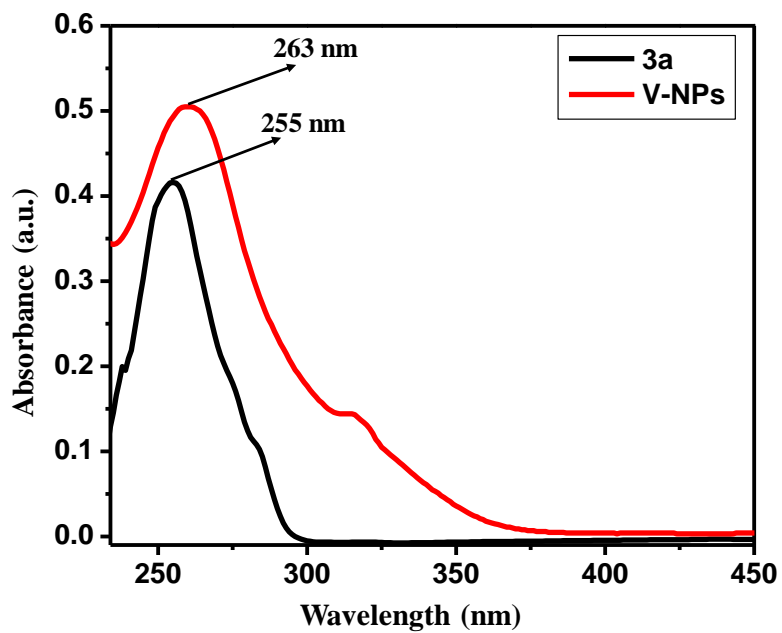

**Fig. S15:** UV-Visible spectra of 3a and V-NPs in methanol ( $10^{-6}$  M)

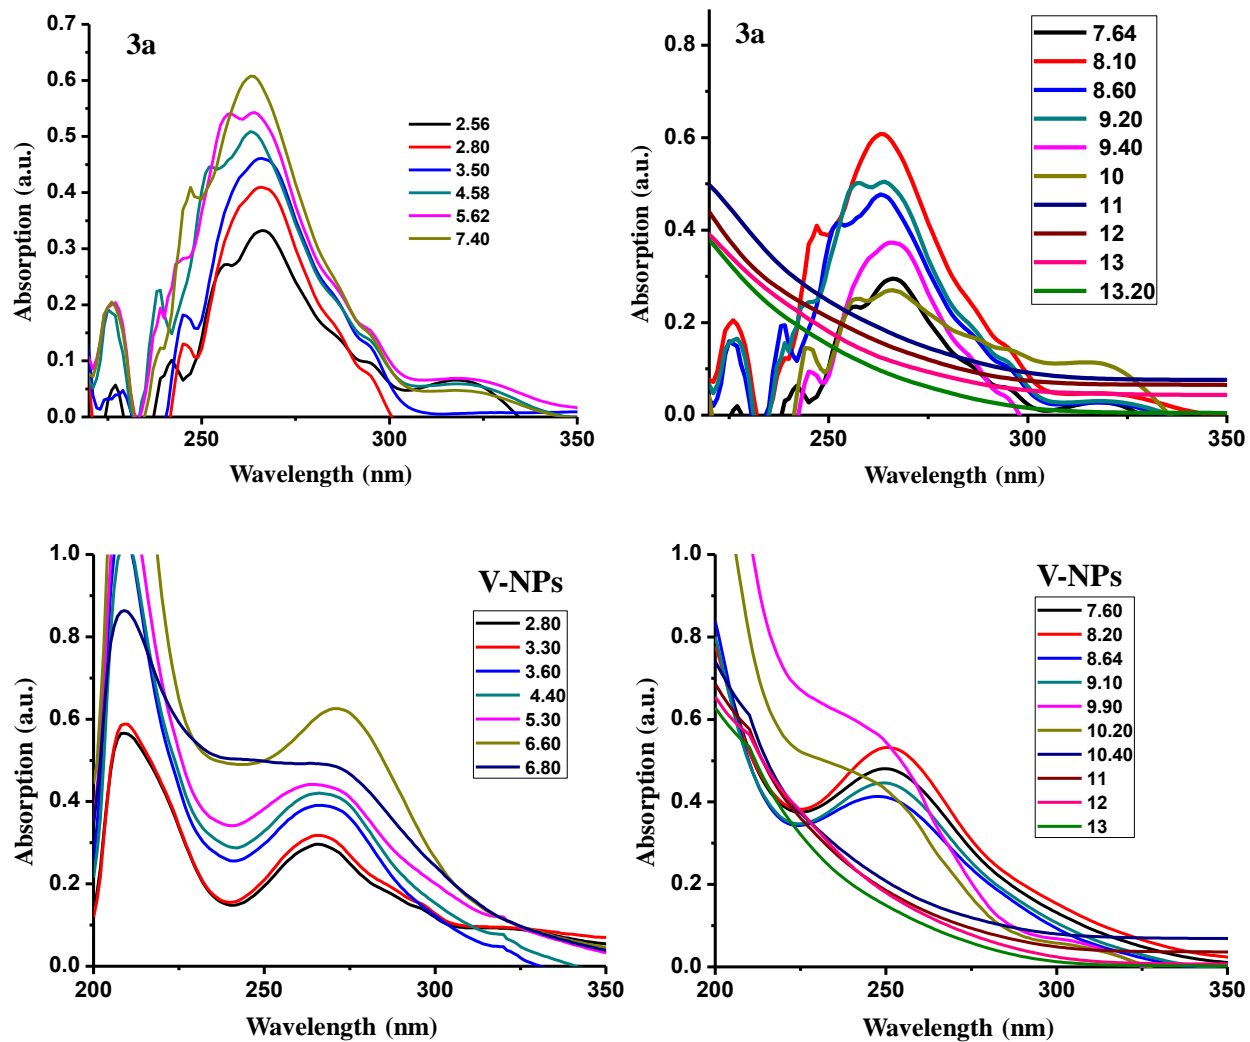

**Fig. S16:** The absorption intensities of 3a and V-NPs as functions of pH values.



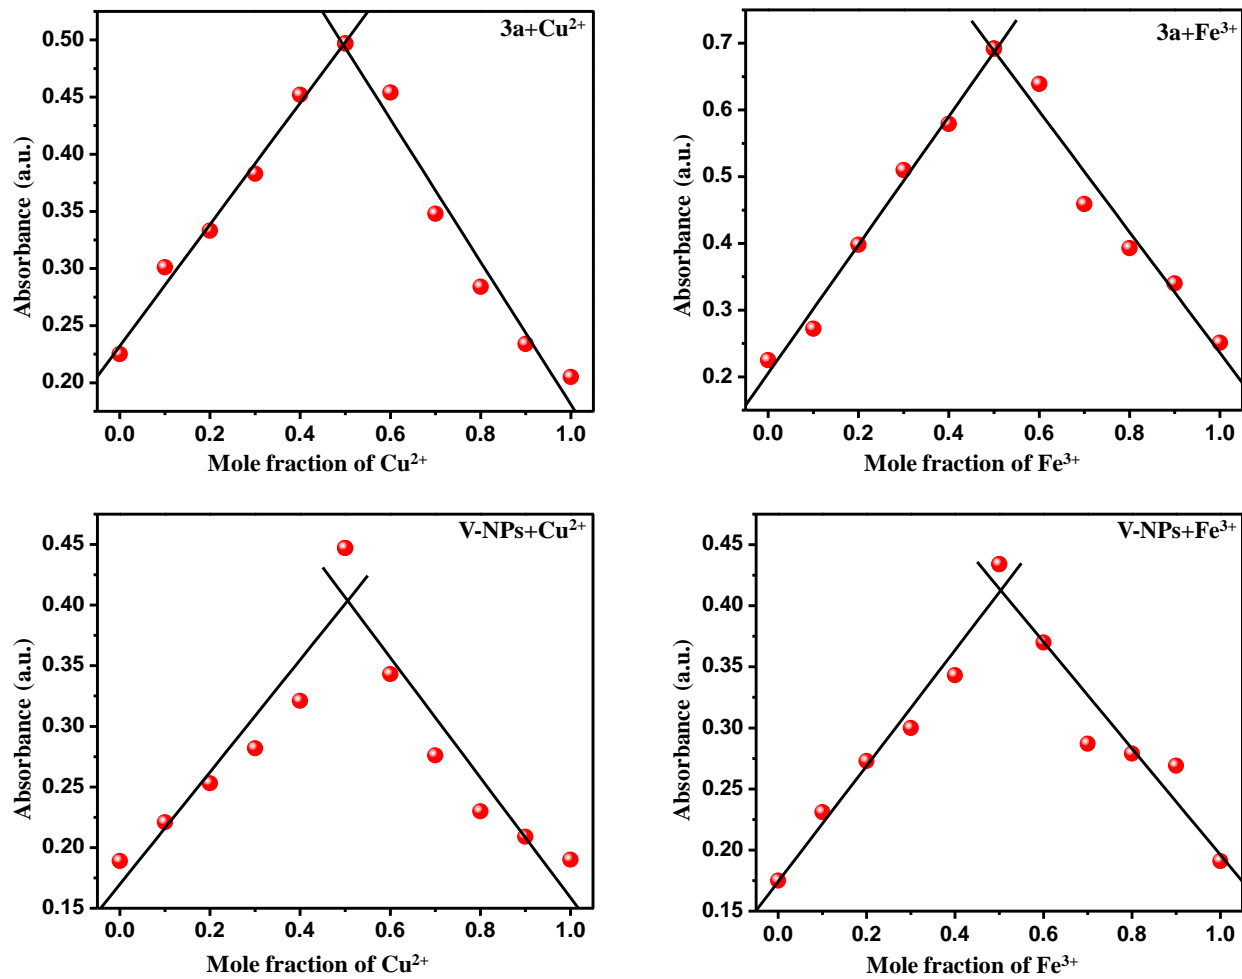

**Fig. S17:** Job's plots for the complexation of 3a and V-NPs with Cu<sup>2+</sup> and Fe<sup>3+</sup> ions in methanol showing 1:1 stoichiometry

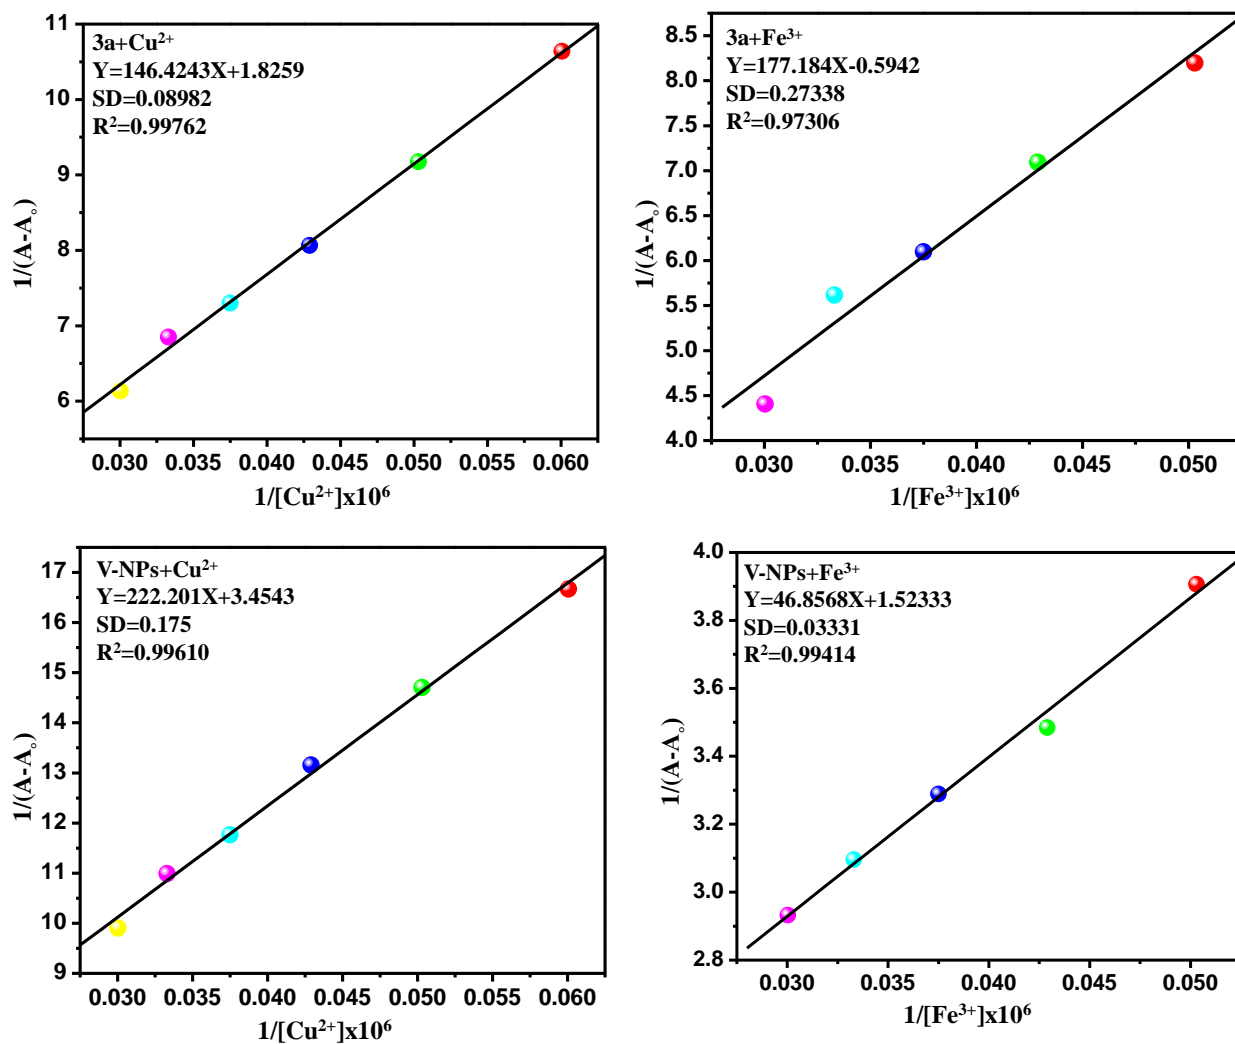

**Fig. S18:** B-H plots for the compounds 3a and V-NPs with Cu<sup>2+</sup> and Fe<sup>3+</sup> ions at 269 nm

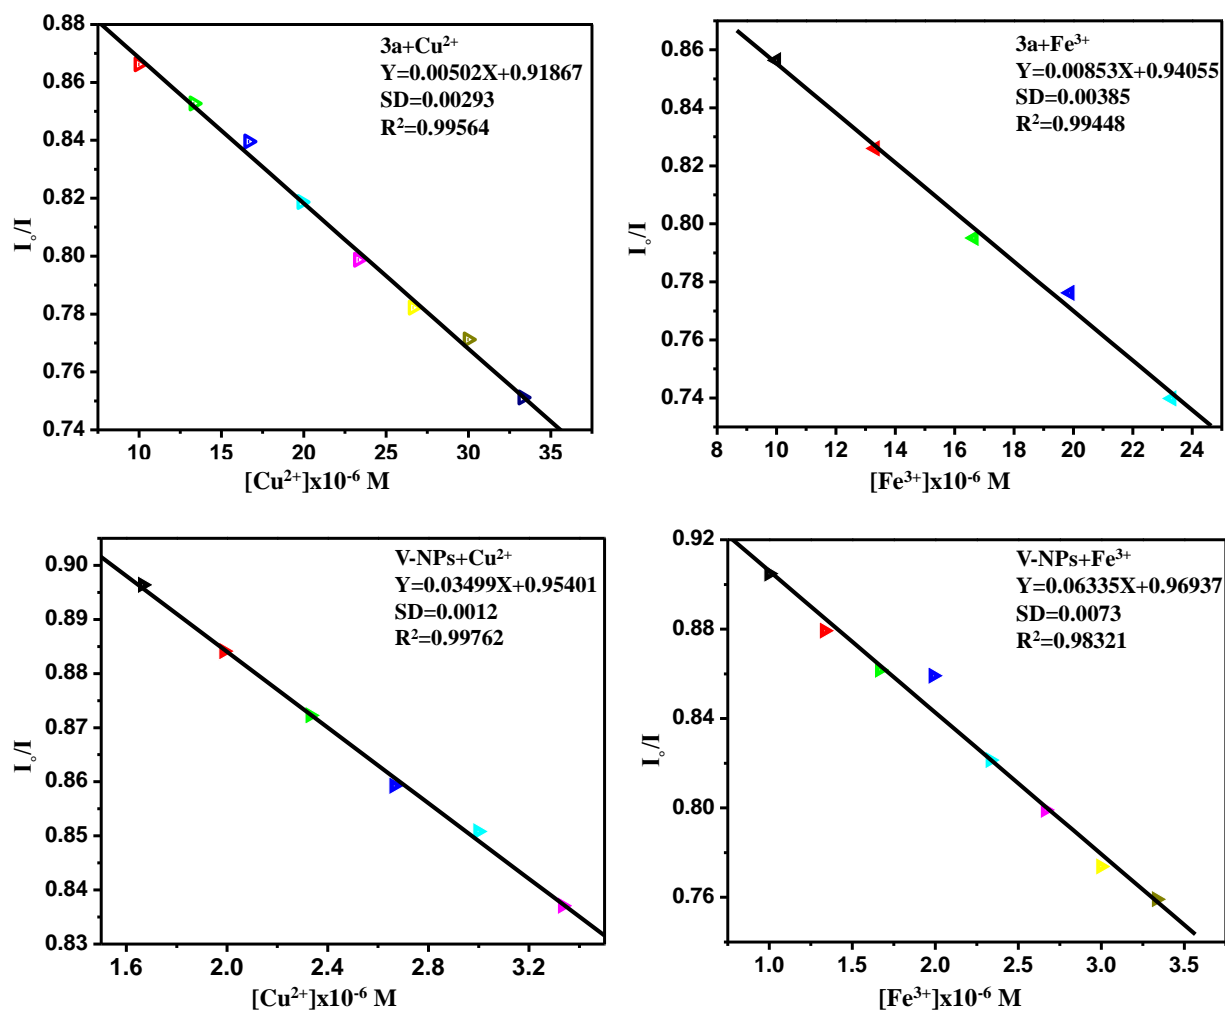

**Fig. S19:** LOD plots of 3a and V-NPs for Cu<sup>2+</sup> and Fe<sup>3+</sup> ions at 269 nm

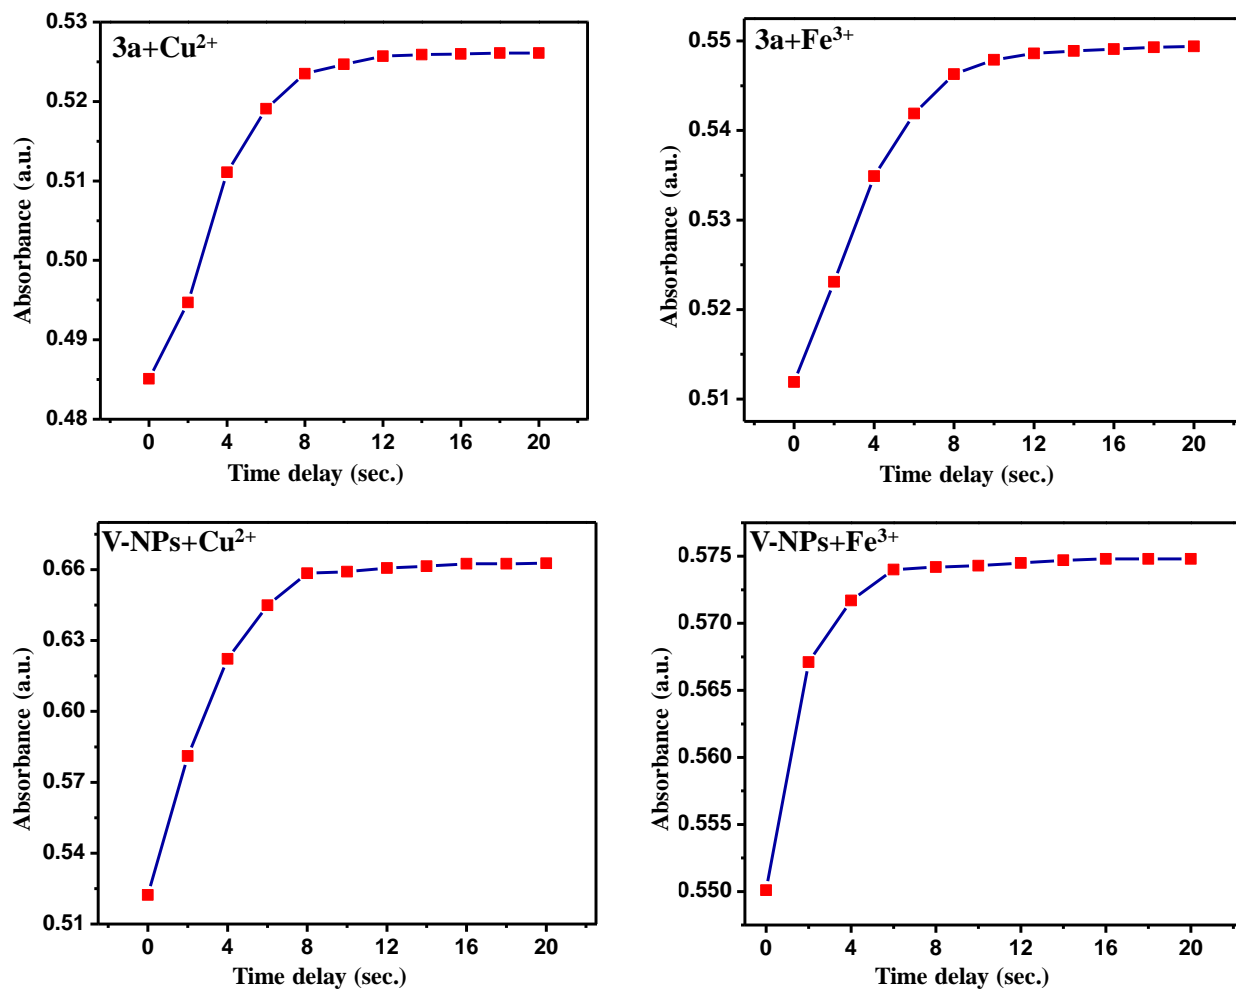

**Fig. S20:** Response time studies of 3a and V-NPs in the presence of  $Cu^{2+}$  and  $Fe^{3+}$  ions ( $50 \mu M$ )

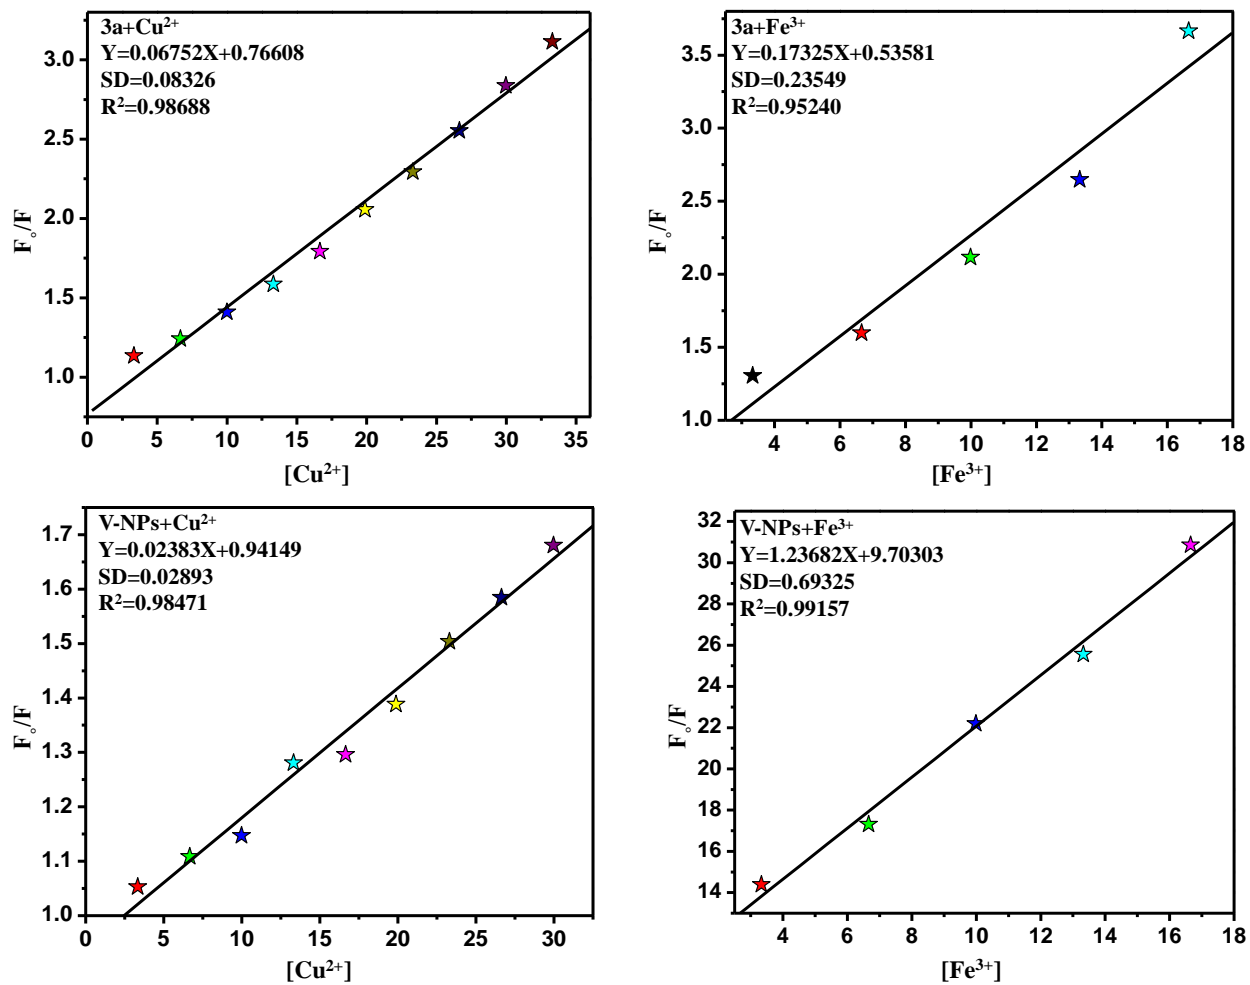

**Fig. S21:** Stern-Volmer plots for the compounds 3a and V-NPs at 527 nm

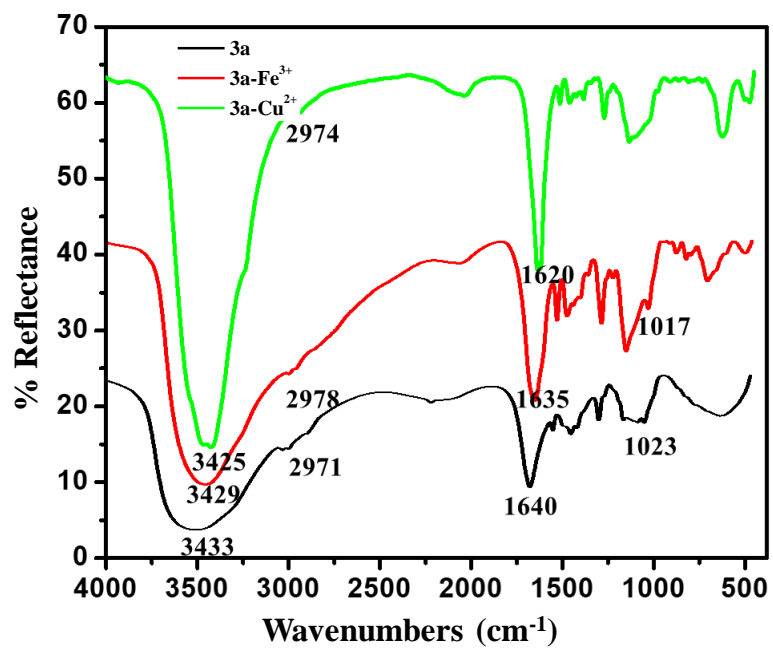

Fig. S22: FT-IR spectra of 3a, 3a+Cu<sup>2+</sup> and 3a+Fe<sup>3+</sup>
